# Supplementary material for: Sorting nexin-21 is a scaffold for the endosomal recruitment of huntingtin
Source: Oxford University Press journal article supplement (doi:10.1242/jcs.211672), 2018-08-02
Supplement: jcs211672supp.pdf [file jcs211672supp.pdf]

**Supplementary Table 1 – Primer sequences used for site-directed mutagenesis.**

| <b>Mutation</b>     |             | <b>Primer Sequence (5'-3')</b>                      |
|---------------------|-------------|-----------------------------------------------------|
| D48K                | (sense)     | ggccctcggcgtccttgctcctccagctct                      |
|                     | (antisense) | agagctggaggacaaggacgccgagggcc                       |
| D68K                | (sense)     | cgctcctcctgccttctcggcgctggtg                        |
|                     | (antisense) | caccagcggcagaaggacgaggacgacg                        |
| D48K, D49K          | (sense)     | ctcagagctggaggacaagaaggccgagggcctgtcct              |
|                     | (antisense) | aggacaggccctcggccttctgtcctccagctctgag               |
| D68K,D71K,D74K,D77K | (sense)     | ccagcctcctcctgtcctccttctcgtccttctcgtccttctcggcgctgg |
|                     | (antisense) | ccagcggcagaaggacgagaaggacgagaaggagacaaggagggctgg    |
| Δ41-49              | (sense)     | acaggccctcggccgaaactgctcg                           |
|                     | (antisense) | cgagcagtttccggcggagggcctgt                          |
| Δ67-69              | (sense)     | ggtcagggccagcggcgctggtgaag                          |
|                     | (antisense) | cttcaccagcggcgtggccctgacc                           |
| L260A               | (sense)     | ccagagtgccgagcctcacgatagagcca                       |
|                     | (antisense) | tggcctctatcgtgaggctgcggcactctgg                     |
| Q270A               | (sense)     | gccagctgggctgccagctgccaggca                         |
|                     | (antisense) | tgcttgccagctggcagcccagctgggc                        |
| E307K               | (sense)     | gggcctttacagcatgccgggcct                            |
|                     | (antisense) | aggccgggcatgctgtaagaaggccc                          |
| L310A               | (sense)     | ccccaaagcagctgcggccttctcacagc                       |
|                     | (antisense) | gctgtgagaaggccgcgagctgctgggg                        |
| L313A               | (sense)     | gctctgtcccagccagctgcagggcc                          |
|                     | (antisense) | ggcctgcagctggctgggacaagagc                          |
| L332E               | (sense)     | ccaggcggcaggactcccggacatgggcc                       |
|                     | (antisense) | ggcccatgtccgggagtctgcccctgg                         |
| L363E               | (sense)     | ttgatgagcaattcttggcactggggggtggtg                   |
|                     | (antisense) | ccacaccacccccagtgccaaagaattgctcatcaa                |
| K364E               | (sense)     | tccttgatgagcaattcctcgaactggggggtggtg                |
|                     | (antisense) | caccacccccagctcaggaattgctcatcaagga                  |
| E365K               | (sense)     | ctccttgatgagcaatttttgactggggggtg                    |
|                     | (antisense) | cacccccagctcaaaaaattgctcatcaaggag                   |
| I368K               | (sense)     | ccttagtccagcacctcctcagcaattcttgagactgg              |
|                     | (antisense) | ccagtctcaaagaattgctcgaaggaggtgctggactaagg           |
| E370K               | (sense)     | gtaccttagtccagcaccttctgatgagcaattcttg               |
|                     | (antisense) | caaagaattgctcatcaagaaggctggactaaggtag               |

## **Supplementary Table 2 - Unfiltered SNX21 interactome obtained from RPE-1 cells**

GFP and GFP-SNX21 expressing RPE-1 cells were respectively cultured in light (R0K0) and medium (R6K4) media for at least six doublings to ensure steady-state protein labelling. Thereafter, immuno-isolation of the GFP tag was achieved through GFP-nanotrap prior to mixing of the two samples and protein resolution on SDS/PAGE and protein identification by LC-MS/MS. The unfiltered data shows the presence of around 4,400 proteins. Parameter definitions are:

Accession: Uniprot accession number of the protein

Coverage: Percentage of protein sequence covered by identified peptides

# Peptide Spectrum Matches (PSMs): Total number of peptides identified (including multiples of same peptide sequence)

# Peptides: Total number of unique peptides identified (multiples of same peptide sequence count as single peptide)

# AAs: Number of amino acids in the protein

[kDa]: Mass of the protein

calc. pI: Calculated isoelectric point of the protein

Score: Combines several parameters; a high score generally indicates high protein abundance and a high confidence of the software in the detection and quantification.

Medium/Light: Ratio of the quantification values of the medium (GFP-SNX21) and light (GFP) quantification channels

Medium/Light Count: Number of peptides quantified used to calculate Medium/Light ratio

Medium/Light Variability (%): Variability of the protein ratios used to calculate the Medium/Light ratio

Description: Name of the protein

[Click here to Download Table S2](#)

### **Supplementary Table 3 - Filtered SNX21 interactome**

The raw unfiltered data from Supplementary Table 2 was subjected to filtration based on two criteria: more than 2 peptides detected for an individual protein, and a Medium/Light enrichment ratio (i.e. GFP-SNX21/GFP) of greater than 20. This defined that the SNX21 interactome in RPE-1 cells is comprised of 287 proteins. Parameter definitions are as in the legend to Supplementary Table 2

[Click here to Download Table S3](#)

### **Supplementary Table 4**

Raw data; Quantitative analysis of GFP-SNX21 co-localisation (Pearson's correlation) with endogenous markers of the endosomal network.

[Click here to Download Table S4](#)

### **Supplementary Table 5**

Raw data; Quantitative analysis of GFP-SNX21 co-localisation (Pearson's correlation) with mCherry-tagged Rab proteins.

[Click here to Download Table S5](#)

### **Supplementary Table 6**

Raw data; Quantitative analysis of co-localisation (Pearson's correlation) between GFP-tagged Sorting Nexins and endogenous Huntingtin, Septin 2, 7 and 9.

[Click here to Download Table S6](#)

### **Supplementary Table 7**

Raw data; Quantitative analysis of Huntingtin co-immunoprecipitation with endogenous SNX21.

[Click here to Download Table S7](#)

### **Supplementary Table 8**

Raw data; Quantitative analysis of endogenous Huntingtin co-immunoprecipitation with GFP-SNX21 (WT) and GFP-SNX21 (aa1-129).

[Click here to Download Table S8](#)

### **Supplementary Table 9**

Raw data; Quantitative analysis of endogenous Huntingtin co-localisation with GFP-SNX21 (WT) and GFP-SNX21 (D48K, D49K).

[Click here to Download Table S9](#)

### **Supplementary Table 10**

Raw data; Quantitative analysis of endogenous Septin 7 co-localisation with GFP-SNX21 (WT) and GFP-SNX21 (L363A)

[Click here to Download Table S10](#)

### **Supplementary Table 11**

Raw data; Quantitative analysis of endogenous Septin 9 co-localisation with GFP-SNX21 (WT) and GFP-SNX21 (L363A)

[Click here to Download Table S11](#)
